# Supplementary material for: Development of composite separators by coating hydrochloric acid-treated halloysite nanotubes on polypropylene separators for lithium-ion batteries
Source: Royal Society of Chemistry journal article supplement (doi:10.1039/d4ra02164a), 2024-01-01
Supplement: d4ra02164a1.pdf [file d4ra02164a1.pdf]

**Table S1** The mass of HNTs before and after HCl treatment.

| HCl concentration (M) | Mass before HCl treatment (g) | Mass after HCl treatment (g) | Mass reduction rate (%) |
|-----------------------|-------------------------------|------------------------------|-------------------------|
| 0.4                   | 1.30                          | 1.13                         | 13%                     |
| 0.8                   | 1.30                          | 0.99                         | 24%                     |
| 1.2                   | 1.30                          | 0.83                         | 36%                     |
| 4                     | 1.30                          | 0.60                         | 54%                     |
| 6                     | 1.30                          | 0.60                         | 54%                     |
| 8                     | 1.30                          | 0.60                         | 54%                     |

**Table S2** The loading of  $\text{LiFePO}_4$  in each cell assembled with PP and PP/HNTs composite separators.

| Samples       | Loading in rate performance ( $\text{mg cm}^{-2}$ ) | Loading in cycling performance ( $\text{mg cm}^{-2}$ ) |
|---------------|-----------------------------------------------------|--------------------------------------------------------|
| PP            | 3.91                                                | 3.96                                                   |
| PP/HNTs-0 M   | 3.91                                                | 4.20                                                   |
| PP/HNTs-0.4 M | 4.65                                                | 4.45                                                   |
| PP/HNTs-0.8 M | 3.85                                                | 3.84                                                   |
| PP/HNTs-1.2 M | 3.72                                                | 3.86                                                   |
| PP/HNTs-4 M   | 3.84                                                | 3.65                                                   |
